# Supplementary material
Source: ML conference proceedings conference paper supplement (https://openreview.net/forum?id=yZkF6xqhfQ)
Supplement: supplementary_material [file attachment]

# ANALYZING MULTIPLE-STEP REASONING ABILITIES OF TRANSFORMERS

**Anonymous authors**

Paper under double-blind review

## CONTENTS

|                                                    |          |
|----------------------------------------------------|----------|
| <b>A Visualization of Transformer Layers</b>       | <b>1</b> |
| <b>B Algorithms</b>                                | <b>1</b> |
| <b>C Table of Constraints and Notations</b>        | <b>5</b> |
| <b>D Problem Space Size Estimation</b>             | <b>5</b> |
| <b>E Input Representation (Additional Results)</b> | <b>5</b> |
| <b>F Annotated Proof (Additional Results)</b>      | <b>5</b> |
| <b>G Fully Symbolic Proofs</b>                     | <b>5</b> |
| <b>H Out-of-Distribution Evaluation</b>            | <b>8</b> |
| <b>I Curriculum Learning</b>                       | <b>9</b> |

## A VISUALIZATION OF TRANSFORMER LAYERS

Following Piotrowski et al. (2019), we also attempt to understand what the Transformer networks are learning through layer-wise visualization of attention (Vig, 2019). We take model trained on COARSE granularity proofs using INFIX representation for 1 variable using the SMALL COEFF configuration. We take the following example:

$$\begin{aligned} P_0 &= \frac{(4 * x_1^2) * (5 * x_1^3 + 4 * x_1)}{(20 * x_1^5 + 16 * x_1 * * 3)} + (12 * x_1), & /* \text{MULSTEP} */ \\ &= (20 * x_1^5 + 16 * x_1 * * 3) + (12 * x_1) \end{aligned}$$

In Figure 1, we observe that in layer 2 encoder-decoder attention indicates that while generating the number 16, the Transformer network is clearly able to attend to the two digits 4 and 4 required for the multiplication. In Figure 2, we observe that the Transformer networks, in the same time also learns to copy the expression  $12 + x_1$  in Layer 1. Even though such clear logical patterns emerge quite frequently, in some cases patterns become hard to interpret.

## B ALGORITHMS

The polynomial sampling algorithms `buildProduct` and `buildFactor` are provided in Algorithms 1 and 2 respectively.

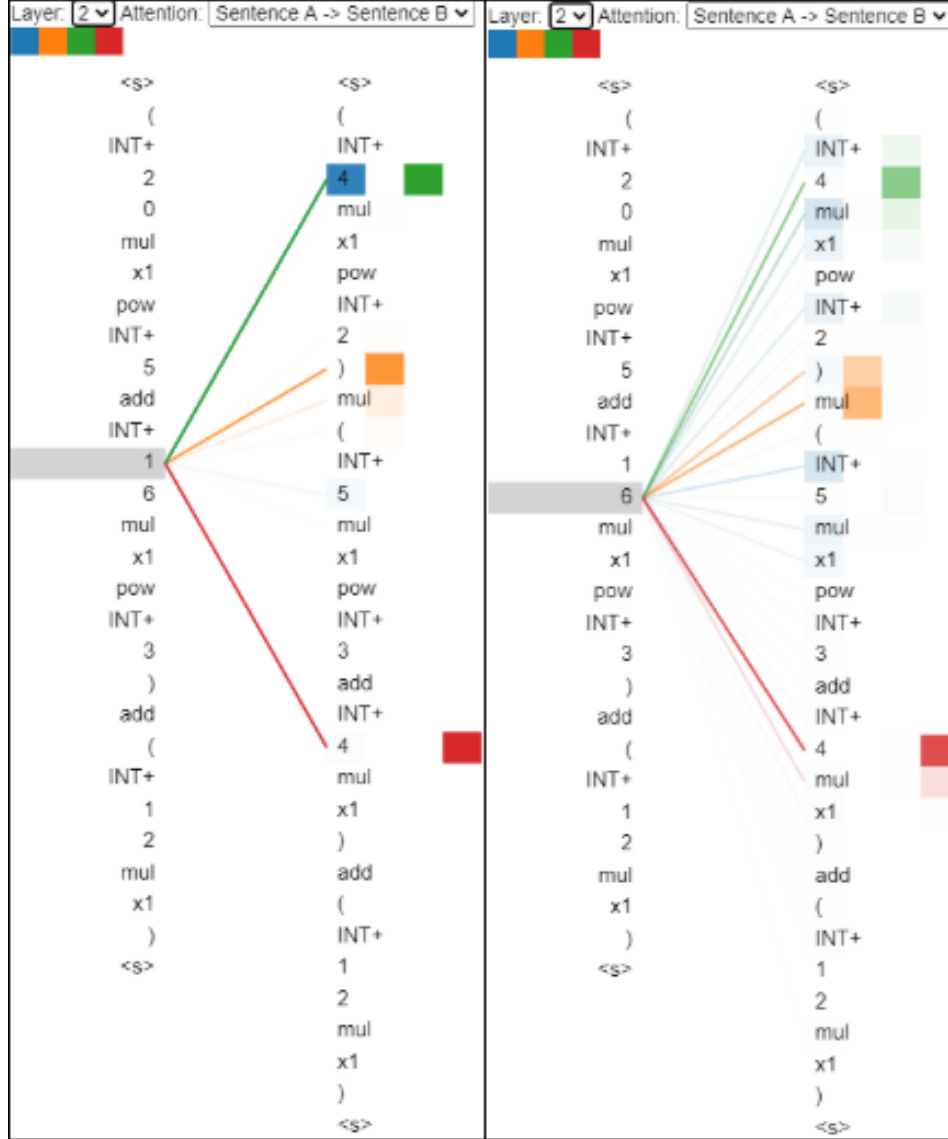

Figure 1: The layer 2 encoder-decoder attention for the output digits 16 in the first simplified product for the output  $(20 * x_1^5 + 16 * x_1 * * 3) + (12 * x_1)$ . As expected, the digits 1 and 6 attends to the coefficients of the first and third monomial in the input expression  $(4 * x_1^2) * (5 * x_1^3 + 4 * x_1) + (12 * x_1)$ . Config: COARSE, SMALL COEFF, INFIX, 1 variable.

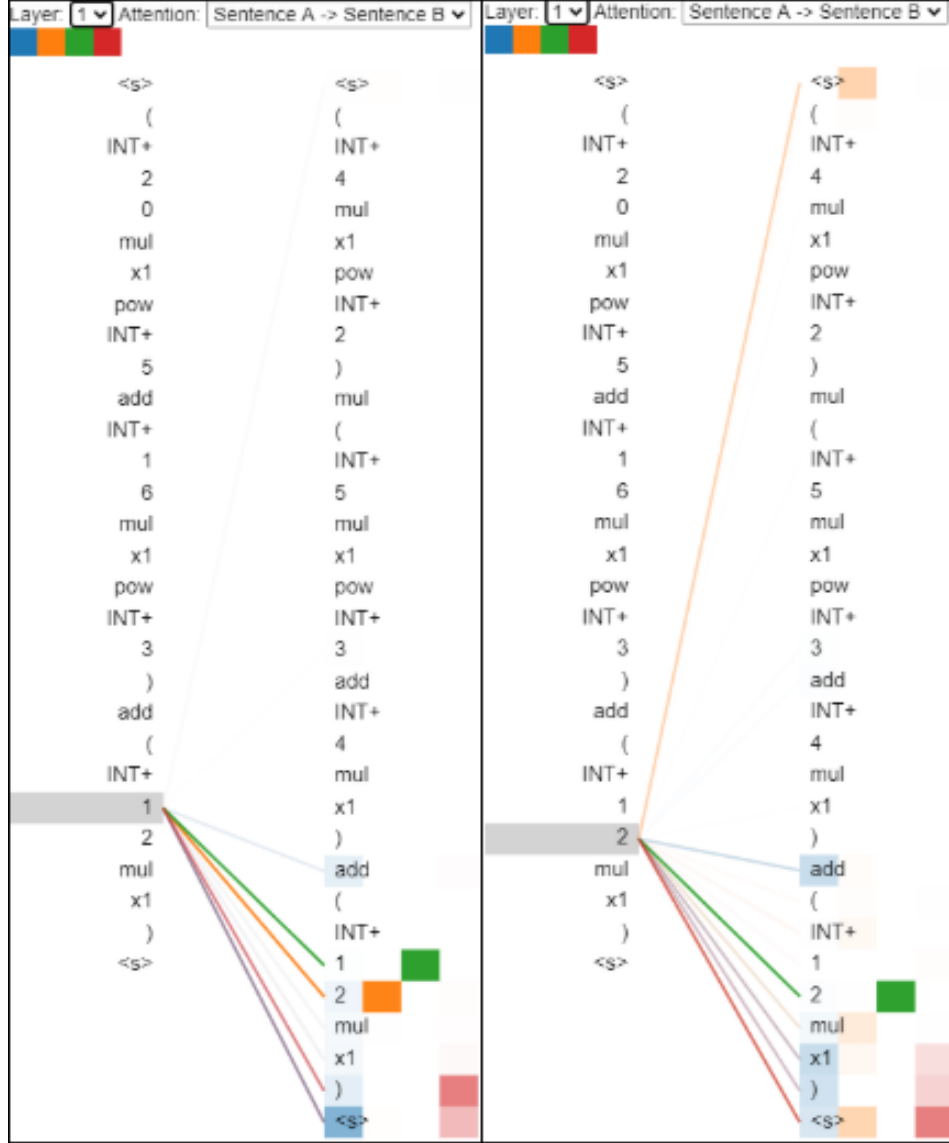

Figure 2: The layer 1 encoder-decoder attention for the coefficient 12 in the last product  $(20 * x_1^5 + 16 * x_1 * * 3) + (12 * x_1)$ . It is expected, that in this step, this product remains unchanged and simply copied to the output. Therefore, we see that the layers learn to copy the coefficients directly by attending to the corresponding digits (i.e. 1 attends to 1 in the last product). Config: COARSE, SMALL COEFF, INFIX, 1 variable.

**Algorithm 1: BuildProduct (Sampling Products)**


---

**Input:**  $x_{\mathcal{P}}, mdeg$   
**Constraints:**  $nvars\_prod, max\_coeff\_prod, max\_fac\_prod, max\_terms\_prod$   
**Output:** A list of factors  $F_{seq}$

```

1 Sample  $nvar \in \{num\_vars\_fac, \dots, nvars\_prod\}$ 
2  $nvar = \min(|x_{\mathcal{P}}|, nvar)$ 
3 Sample  $nvar$  variables from  $x_{\mathcal{P}}$  as  $x_{\mathcal{P}_i}$  // Variable set for this product
4 Sample  $nfac \in \{2, \dots, max\_fac\_prod\}$  // #Factors for this product
  /* Get maximum degree, terms and coefficient available */
5  $rdegree = mdeg, rterms = max\_terms\_prod, rcoeff = max\_coeff\_prod$ 
6  $cprod = 1$  // Keeping track of product built till now
7  $F_{seq} = []$ 
8 for  $j \leftarrow 1$  to  $nfac$  1 do
9    $f_j = \text{buildFactor}(x_{\mathcal{P}_i}, rdegree, rterms, rcoeff)$ 
  /* Update degree, terms and coefficient for next factor */
10   $cprod = cprod * f_j$ 
11   $rdegree = rdegree - degree(f_j)$ 
12   $rterms = max\_terms\_prod / terms(cprod)$ 
13   $rcoeff = max\_coeff\_prod / max(coeffs(cprod))$ 
14  Append  $f_j$  in  $F_{seq}$ 
15  if  $rdegree == 0$  then
16    break
17  end
18 end
19 Shuffle  $F_{seq}$ 

```

---

**Algorithm 2: BuildFactor (Sampling A Factor)**


---

**Input:**  $x_{\mathcal{P}_i}, rdegree, rterms, rcoeff$   
**Constraints:**  $num\_vars\_fac, max\_coeff\_fac, max\_terms\_fac, max\_degree\_fac$   
**Output:** A factor  $f_j$ , Number of terms  $nterms_j$

```

1 Sample  $nvar \in \{1, \dots, num\_vars\_fac\}$ 
2  $cvars = \text{Sample } nvar \text{ variables from } x_{\mathcal{P}_i}$  // Variable set for this factor
3 Sample  $nterms \in \{1, \dots, \min(max\_terms\_fac, rterms)\}$  // # Terms for this factor
4 Sample  $\{d_k\}_{k=1}^{nterms}$ , s.t.  $d_k \in \{0, \dots, \min(max\_degree\_fac, rdegree)\}$ 
  // Term degrees: degree 0 allows for constant terms
5 Sample  $\{c_k\}_{k=1}^{nterms}$ , s.t.  $c_k \in \{1, \dots, \min(max\_coeff\_fac, rcoeff)\}$  // Term coefficients
6 for  $k \leftarrow 1$  to  $nterms$  1 do
7   selects  $d[k]$  variables from  $cvars$  with replacement
  // E.g. if  $d[k] = 4, cvars = [x_1, x_2]$ . May sample  $[x_1, x_2, x_1, x_1]$ 
8   Convert the selected  $d[k]$  variables to a term //  $t_k = c_k * x_1^3 * x_2$ 
9 end
10  $f_j = \sum_{k=1}^{nterms} t_k$ 
11 return  $f_j$ ;

```

---

## C TABLE OF CONSTRAINTS AND NOTATIONS

We provide the full list of constraints and notations in Table 1.

|                            |                               |                                                                                                                             |
|----------------------------|-------------------------------|-----------------------------------------------------------------------------------------------------------------------------|
| Term<br>Constraints        | #Products                     | $n_{\text{prod}} \in \{2, \dots, \max P_{\mathcal{P}}\}$                                                                    |
|                            | #Factors in $P_i$             | $n_{\text{fac}_i} \in \{2, \dots, \max f_{\mathcal{P}}\}, \forall i \in \{1, \dots, n_{\text{prod}}\}$                      |
|                            | #Terms in $f_{ij}$            | $ \text{terms}(f_{ij})  \in \{1, \dots, \max T_{\mathcal{F}}\}, \forall f_{ij} \in f_{\mathcal{P}}$                         |
|                            | #Terms in $\hat{P}_i$         | $ \text{terms}(\hat{P}_i)  \leq \max T_{\mathcal{P}} \forall P_i \in \mathcal{P}_0$                                         |
| Degree<br>Constraints      | #Degree in $\hat{P}$          | $\sum d_{mn} \leq D_{\mathcal{P}}, \forall m \hat{t}_m \in \text{terms}(\hat{P}), \forall n x_n \in \text{vars}(\hat{t}_m)$ |
|                            | #Degree in $f_{ij}$           | $\sum d_{kl} \leq D_{\mathcal{F}}, \forall k \text{ terms}(f_{ij}), \forall f_{ij} \in f_{\mathcal{P}}$                     |
| Variable<br>Constraints    | #Variables in $\mathcal{P}_0$ | $ x_{\mathcal{P}}  \leq V_{\mathcal{P}}$                                                                                    |
|                            | #Variables in $P_i$           | $ \text{vars}(P_i)  \leq V_{\mathcal{P}}, \forall P_i \in \mathcal{P}_0$                                                    |
|                            | #Variables in $f_i$           | $ \text{vars}(f_{ij})  \leq V_{\mathcal{F}}, \forall f_{ij} \in f_{\mathcal{P}}$                                            |
| Coefficient<br>Constraints | Coeff in $\hat{P}$            | $\hat{a}_j \leq C_{\mathcal{P}}, \forall \hat{a}_j \in \text{coeffs}(\hat{P})$                                              |
|                            | Coeff in $\hat{P}_i$          | $\hat{a}_{ij} \leq C_{\mathcal{P}}, \forall a \text{ coeffs}(\hat{P}_i), \forall P_i \in \mathcal{P}_0$                     |
|                            | Coeff in $f_i$                | $a_k \leq C_{\mathcal{F}}, \forall a \text{ coeffs}(f_{ij}), \forall f_{ij} \in f_{\mathcal{P}}$                            |

Table 1: List of notations, and corresponding constraints that a generated polynomial satisfies.

## D PROBLEM SPACE SIZE ESTIMATION

We present the problem space size estimates here in Table 2.

| Config              | NVAR = 1                  |                           | NVAR = 2                  |                           |
|---------------------|---------------------------|---------------------------|---------------------------|---------------------------|
|                     | Equation<br>Size Estimate | Endpoint<br>Size Estimate | Equation<br>Size Estimate | Endpoint<br>Size Estimate |
| <b>SMALL COEFF</b>  | 104M                      | 8.24M                     | 184M                      | 27.4M                     |
| <b>MEDIUM COEFF</b> | 179M                      | 16.3M                     | 325M                      | 42.4M                     |
| <b>LARGE COEFF</b>  | 289M                      | 32M                       | 507M                      | 68.8M                     |
| <b>NO BACKTRACK</b> | 324M                      | 54.9M                     | 538M                      | 104M                      |
| <b>MEDIUM DEG</b>   | 459M                      | 67.4M                     | 902M                      | 144M                      |
| <b>MEDIUM TERMS</b> | 866M                      | 31.5M                     | 1.73B                     | 801M                      |

Table 2: Size Estimates for the problem space, after generating sets of size 5M.

## E INPUT REPRESENTATION (ADDITIONAL RESULTS)

We present the results for FINE configuration for 2 variable setting here in Table 3. The errors made by the models for 1 Variable and 2 Variable settings are presented in Tables 4 and 5 respectively.

## F ANNOTATED PROOF (ADDITIONAL RESULTS)

We present the results for COARSE and FINE configuration for 2 variable setting for annotated proofs here in Table 6. The errors made by the models for 1 Variable and 2 Variable settings are presented in Tables 7 and 8 respectively.

## G FULLY SYMBOLIC PROOFS

As  $> 80\%$  of the errors occurred in multiplication step, we separately tested the Transformer’s ability to do arithmetic, by creating datasets involving multiplication and addition of 4-digit and 9-digit numbers. While the models quickly achieved an accuracy of close to 99% for addition; for multiplication, they could not go beyond even 1% after seeing 2M examples. Hence, we envision

| Config              | Proof Type  | Endpoint |               | #Train | Full Proof      |                      | Stepwise   |             | Calibration |       |       |      |
|---------------------|-------------|----------|---------------|--------|-----------------|----------------------|------------|-------------|-------------|-------|-------|------|
|                     |             | #EE      | Endpoint Acc. |        | Full Proof Acc. | Greedy Stepwise Acc. | Top-1 Acc. | Beam-5 Acc. | Sure Rate   | P     | R     | F1   |
| <b>SMALL COEFF</b>  | Infix/Fine  | 4.3M     | 94.7          | 4.6M   | 88.1            | 97.19                | 90.7       | 92.2        | 83.47       | 100   | 92.02 | 0.96 |
|                     | Prefix/Fine | 4.5M     | 93.93         | 5.4M   | 90.3            | 97.83                | 94.63      | 96.2        | 87.9        | 99.96 | 92.85 | 0.96 |
| <b>MEDIUM COEFF</b> | Infix/Fine  | 7M       | 95.3          | 4.4M   | 82.2            | 96.25                | 94.28      | 95.76       | 86.24       | 100   | 91.47 | 0.96 |
|                     | Prefix/Fine | 5.2M     | 92.77         | 2.9M   | 72.4            | 93.6                 | 91.53      | 94.33       | 81.97       | 100   | 89.55 | 0.94 |
| <b>LARGE COEFF</b>  | Infix/Fine  | 9M       | 91.8          | 3.2M   | 73              | 93.85                | 77.94      | 82.2        | 63          | 99.9  | 80.75 | 0.89 |
|                     | Prefix/Fine | 6.1M     | 86.6          | 4.7M   | 78.6            | 95.6                 | 91.93      | 93.47       | 83.87       | 100   | 91.23 | 0.95 |
| <b>NO BACKTRACK</b> | Infix/Fine  | 8.6M     | 83.8          | 5.8M   | 72.5            | 94.64                | 81.54      | 84.82       | 72.34       | 100   | 88.72 | 0.94 |
|                     | Prefix/Fine | 7.1M     | 79.2          | 4.1M   | 60.7            | 90.48                | 81.73      | 85.67       | 70.2        | 99.91 | 85.81 | 0.92 |
| <b>MEDIUM DEG</b>   | Infix/Fine  | 4.9M     | 87.9          | 3.6M   | 73.5            | 94.21                | 89.78      | 92.46       | 77.22       | 100   | 86.01 | 0.92 |
|                     | Prefix/Fine | 5.2M     | 83.73         | 4.6M   | 73.6            | 94.57                | 86.5       | 89.4        | 76.93       | 100   | 88.94 | 0.94 |
| <b>MEDIUM TERMS</b> | Infix/Fine  | 8.5M     | 90            | 4.8M   | 64              | 92.98                | 79.04      | 81.86       | 66.92       | 99.88 | 84.56 | 0.92 |
|                     | Prefix/Fine | 6.6M     | 87.07         | 4.5M   | 62.9            | 92.74                | 86.4       | 89.07       | 73.67       | 100   | 85.26 | 0.92 |

Table 3: Results for FINE configuration for 2 Variables for Infix and Prefix representation (No curriculum, No annotation).

| Config              | Proof Type    | Full Proof          |                          | Error Percentage |               |               |               |               |               |
|---------------------|---------------|---------------------|--------------------------|------------------|---------------|---------------|---------------|---------------|---------------|
|                     |               | Full Proof Accuracy | Greedy Stepwise Accuracy | First FacStep    | Total FacStep | First MulStep | Total MulStep | First SumStep | Total SumStep |
| <b>SMALL COEFF</b>  | Coarse/Infix  | 95                  | 98.83                    | 8                | 9.43          | 88            | 84.91         | 4             | 5.66          |
|                     | Fine/Infix    | <b>98.9</b>         | <b>99.79</b>             | 0                | 0             | 100           | 100           | 0             | 0             |
|                     | Coarse/Prefix | 95.3                | 98.97                    | 4.26             | 4.08          | 72.34         | 71.43         | 23.4          | 24.49         |
|                     | Fine/Prefix   | 96.9                | 99.4                     | 9.68             | 9.68          | 77.42         | 77.42         | 12.9          | 12.9          |
| <b>MEDIUM COEFF</b> | Coarse/Infix  | 92.8                | 98.24                    | 1.39             | 1.25          | 95.83         | 92.5          | 2.78          | 6.25          |
|                     | Fine/Infix    | 90.3                | 97.99                    | 11.34            | 11.32         | 85.57         | 84.91         | 3.09          | 3.77          |
|                     | Coarse/Prefix | <b>93.6</b>         | <b>98.58</b>             | 3.12             | 2.94          | 95.31         | 95.59         | 1.56          | 1.47          |
|                     | Fine/Prefix   | 91.7                | 98.37                    | 2.41             | 2.33          | 96.39         | 96.51         | 1.2           | 1.16          |
| <b>LARGE COEFF</b>  | Coarse/Infix  | 82.1                | 95.97                    | 3.35             | 3.02          | 93.85         | 91.46         | 2.79          | 5.53          |
|                     | Fine/Infix    | 82.5                | 96.44                    | 2.86             | 2.56          | 93.71         | 90.77         | 3.43          | 6.67          |
|                     | Coarse/Prefix | <b>83.5</b>         | <b>96.25</b>             | 4.24             | 3.78          | 93.94         | 92.97         | 1.82          | 3.24          |
|                     | Fine/Prefix   | 82                  | 96.32                    | 3.33             | 2.97          | 90.56         | 86.63         | 6.11          | 10.4          |
| <b>NO BACKTRACK</b> | Coarse/Infix  | 75.6                | 94.62                    | 2.87             | 3.13          | 93.44         | 86.83         | 3.69          | 10.03         |
|                     | Fine/Infix    | 74.5                | 94.76                    | 3.14             | 3.56          | 93.33         | 78.63         | 3.53          | 17.81         |
|                     | Coarse/Prefix | <b>79.7</b>         | <b>95.38</b>             | 7.39             | 6.57          | 89.16         | 83.94         | 3.45          | 9.49          |
|                     | Fine/Prefix   | 74.7                | 95.23                    | 2.37             | 2.41          | 96.44         | 89.16         | 1.19          | 8.43          |
| <b>MEDIUM DEG</b>   | Coarse/Infix  | <b>92.8</b>         | <b>98.26</b>             | 5.56             | 6.02          | 86.11         | 79.52         | 8.33          | 14.46         |
|                     | Fine/Infix    | 83.4                | 96.12                    | 6.63             | 5.56          | 89.76         | 83.33         | 3.61          | 11.11         |
|                     | Coarse/Prefix | 87.7                | 96.82                    | 4.07             | 3.57          | 93.5          | 90.71         | 2.44          | 5.71          |
|                     | Fine/Prefix   | 90.6                | 97.92                    | 8.51             | 7.55          | 89.36         | 87.74         | 2.13          | 4.72          |
| <b>MEDIUM TERMS</b> | Coarse/Infix  | 72.7                | 93.99                    | 25.64            | 24.18         | 73.26         | 69.72         | 1.1           | 6.1           |
|                     | Fine/Infix    | 75.1                | 95.42                    | 21.29            | 20.51         | 75.1          | 69.94         | 3.61          | 9.55          |
|                     | Coarse/Prefix | <b>76.3</b>         | <b>95.78</b>             | 7.59             | 8.71          | 88.61         | 84.67         | 3.8           | 6.62          |
|                     | Fine/Prefix   | 74.8                | 95.55                    | 14.68            | 16.76         | 79.76         | 74.28         | 5.56          | 8.96          |

Table 4: Errors for 1 variable in the COARSE and FINE configuration for both Infix and Prefix input representation. (No curriculum, No annotation).

| Config       | Proof Type    | Full Proof          |                          | Error Percentage |               |               |               |               |               |
|--------------|---------------|---------------------|--------------------------|------------------|---------------|---------------|---------------|---------------|---------------|
|              |               | Full Proof Accuracy | Greedy Stepwise Accuracy | First FacStep    | Total FacStep | First MulStep | Total MulStep | First SumStep | Total SumStep |
| SMALL COEFF  | Coarse/Infix  | 87.9                | 97.01                    | 5.79             | 4.9           | 88.43         | 79.72         | 5.79          | 15.38         |
|              | Fine/Infix    | <b>88.1</b>         | <b>97.19</b>             | 8.4              | 7.98          | 75.63         | 68.1          | 15.97         | 23.93         |
|              | Coarse/Prefix | <b>91.2</b>         | <b>98.08</b>             | 1.14             | 1.03          | 88.64         | 84.54         | 10.23         | 14.43         |
|              | Fine/Prefix   | 90.3                | 97.83                    | 8.25             | 6.35          | 80.41         | 73.02         | 11.34         | 20.63         |
| MEDIUM COEFF | Coarse/Infix  | 88.5                | 97.35                    | 4.35             | 3.73          | 83.48         | 76.87         | 12.17         | 19.4          |
|              | Fine/Infix    | 82.2                | 96.25                    | 2.25             | 1.83          | 76.4          | 68.81         | 21.35         | 29.36         |
|              | Coarse/Prefix | <b>84.5</b>         | <b>96.03</b>             | 3.87             | 3.68          | 88.39         | 81.58         | 7.74          | 14.74         |
|              | Fine/Prefix   | 72.4                | 93.6                     | 12.68            | 9.95          | 76.09         | 67.74         | 11.23         | 22.31         |
| LARGE COEFF  | Coarse/Infix  | 80.4                | 95.18                    | 6.12             | 4.84          | 82.65         | 75.81         | 11.22         | 19.35         |
|              | Fine/Infix    | 73                  | 93.85                    | 11.85            | 8.74          | 70.74         | 62.3          | 17.41         | 28.96         |
|              | Coarse/Prefix | <b>83.7</b>         | <b>96.23</b>             | 4.29             | 3.61          | 87.12         | 82.99         | 8.59          | 13.4          |
|              | Fine/Prefix   | 78.6                | 95.6                     | 5.14             | 4.2           | 81.31         | 74.43         | 13.55         | 21.37         |
| NO BACKTRACK | Coarse/Infix  | <b>72.7</b>         | <b>93.13</b>             | 4.4              | 3.15          | 87.55         | 75.79         | 8.06          | 21.07         |
|              | Fine/Infix    | 72.5                | 94.64                    | 3.27             | 2.54          | 85.09         | 73.79         | 11.64         | 23.66         |
|              | Coarse/Prefix | <b>63.2</b>         | <b>89.87</b>             | 3.26             | 2.24          | 91.3          | 78.73         | 5.43          | 19.03         |
|              | Fine/Prefix   | 60.7                | 90.48                    | 2.29             | 1.58          | 89.31         | 72.64         | 8.4           | 25.79         |
| MEDIUM DEG   | Coarse/Infix  | <b>80.5</b>         | <b>95.13</b>             | 6.67             | 5.44          | 81.54         | 71.97         | 11.79         | 22.59         |
|              | Fine/Infix    | 73.5                | 94.21                    | 7.17             | 6.55          | 68.3          | 57.83         | 24.53         | 35.61         |
|              | Coarse/Prefix | <b>83.4</b>         | <b>96.41</b>             | 4.82             | 4.19          | 81.33         | 75.39         | 13.86         | 20.42         |
|              | Fine/Prefix   | 73.6                | 94.57                    | 7.58             | 6.38          | 75.38         | 67.48         | 17.05         | 26.14         |
| MEDIUM TERMS | Coarse/Infix  | 64                  | 92.03                    | 25               | 19.05         | 72.5          | 66.5          | 2.5           | 14.45         |
|              | Fine/Infix    | 64                  | 92.98                    | 13.61            | 8.62          | 79.44         | 69.59         | 6.94          | 21.79         |
|              | Coarse/Prefix | <b>67.8</b>         | <b>93.58</b>             | 10.25            | 7.69          | 87.89         | 80.98         | 1.86          | 11.32         |
|              | Fine/Prefix   | 62.9                | 92.74                    | 9.16             | 5.97          | 85.71         | 74.37         | 5.12          | 19.65         |

Table 5: Errors for 2 variables in the COARSE and FINE configuration for both Infix and Prefix input representation. (No curriculum, No annotation).

| Config       | Proof Type | Endpoint            |                   | # Train Examples | Full Proof          |                          | Stepwise       |                 | Calibration |       |       |      |
|--------------|------------|---------------------|-------------------|------------------|---------------------|--------------------------|----------------|-----------------|-------------|-------|-------|------|
|              |            | # Endpoint Examples | Endpoint Accuracy |                  | Full Proof Accuracy | Greedy Stepwise Accuracy | Top-1 Accuracy | Beam-5 Accuracy | Sure Rate   | P     | R     | F1   |
| SMALL COEFF  | Fine       | 4.3M                | 94.7              | 3.6M             | 82.3                | 97.93                    | 86.47          | 87.5            | 81.83       | 100   | 94.64 | 0.97 |
|              | Coarse     |                     |                   | 5.1M             | <b>85</b>           | <b>98.31</b>             | 93.5           | 94.03           | 90.27       | 100   | 96.54 | 0.98 |
| MEDIUM COEFF | Fine       | 7M                  | 95.3              | 5.4M             | 78.8                | 97.78                    | 93.8           | 94.5            | 90.2        | 99.93 | 96.09 | 0.98 |
|              | Coarse     |                     |                   | 5M               | <b>80.1</b>         | <b>97.69</b>             | 89.37          | 90.27           | 86.77       | 99.96 | 97.05 | 0.98 |
| LARGE COEFF  | Fine       | 9M                  | 91.8              | 4.1M             | 70.1                | 96.59                    | 84.8           | 86.63           | 77.77       | 99.83 | 91.55 | 0.96 |
|              | Coarse     |                     |                   | 4M               | <b>73.2</b>         | <b>96.66</b>             | 92.77          | 93.8            | 87.23       | 100   | 94.04 | 0.97 |
| NO BACKTRACK | Fine       | 8.6M                | 83.8              | 3.5M             | <b>46.5</b>         | <b>92.93</b>             | 84.9           | 87.67           | 74.5        | 99.96 | 87.71 | 0.93 |
|              | Coarse     |                     |                   | 6.7M             | <b>65.5</b>         | <b>95.7</b>              | 67.8           | 69.37           | 63.3        | 99.79 | 93.17 | 0.96 |
| MEDIUM DEG   | Fine       | 4.9M                | 87.9              | 3.9M             | 59.6                | 95.28                    | 94.13          | 95.7            | 86.4        | 100   | 91.78 | 0.96 |
|              | Coarse     |                     |                   | 4.1M             | <b>65.1</b>         | <b>95.61</b>             | 85.43          | 87.43           | 78.2        | 99.96 | 91.49 | 0.96 |
| MEDIUM TERMS | Fine       | 8.5M                | 90                | 4.8M             | <b>56.9</b>         | <b>95.7</b>              | 92.4           | 93.83           | 85.77       | 99.88 | 92.71 | 0.96 |
|              | Coarse     |                     |                   | 4.2M             | 52.8                | 94.57                    | 84             | 85.93           | 75.93       | 99.82 | 90.24 | 0.95 |

Table 6: Results for FINE and COARSE configurations for 2 Variables for annotated proofs (No curriculum).

| Config       | Proof Type | Full Proof          |                          | Error Percentage |               |               |               |               |               |                |                |
|--------------|------------|---------------------|--------------------------|------------------|---------------|---------------|---------------|---------------|---------------|----------------|----------------|
|              |            | Full Proof Accuracy | Greedy Stepwise Accuracy | First FacStep    | Total FacStep | First MulStep | Total MulStep | First SumStep | Total SumStep | First MarkStep | Total MarkStep |
| SMALL COEFF  | Fine       | 88.5                | 98.82                    | 3.48             | 2.99          | 89.57         | 83.58         | 6.09          | 11.19         | 0.87           | 2.24           |
|              | Coarse     | <b>91.9</b>         | <b>99.16</b>             | 1.23             | 1.19          | 98.77         | 96.43         | 0             | 1.19          | 0              | 1.19           |
| MEDIUM COEFF | Fine       | 78.6                | 97.66                    | 18.69            | 15.19         | 74.77         | 74.44         | 3.27          | 6.67          | 3.27           | 3.7            |
|              | Coarse     | <b>84.2</b>         | <b>98.29</b>             | 4.43             | 4.65          | 84.81         | 84.88         | 6.33          | 5.81          | 4.43           | 4.65           |
| LARGE COEFF  | Fine       | 75.5                | 97.37                    | 11.43            | 9.21          | 72.65         | 66.35         | 10.61         | 19.68         | 5.31           | 4.76           |
|              | Coarse     | <b>80.3</b>         | <b>97.86</b>             | 5.58             | 5.86          | 90.86         | 87.39         | 1.02          | 4.5           | 2.54           | 2.25           |
| NO BACKTRACK | Fine       | <b>68</b>           | <b>96.78</b>             | 7.19             | 6.46          | 86.56         | 78.54         | 5.62          | 12.71         | 0.62           | 2.29           |
|              | Coarse     | <b>59.7</b>         | <b>95</b>                | 6.2              | 5.25          | 88.09         | 76.88         | 3.72          | 15.41         | 1.99           | 2.45           |
| MEDIUM DEG   | Fine       | 76                  | 97.37                    | 11.67            | 10.85         | 82.5          | 80.34         | 3.75          | 6.78          | 2.08           | 2.03           |
|              | Coarse     | <b>78.7</b>         | <b>97.38</b>             | 6.1              | 5.84          | 86.38         | 81.32         | 4.69          | 9.73          | 2.82           | 3.11           |
| MEDIUM TERMS | Fine       | <b>70.4</b>         | <b>97.48</b>             | 16.89            | 16.27         | 75            | 69.14         | 3.72          | 8.85          | 4.39           | 5.74           |
|              | Coarse     | 66.2                | 96.34                    | 25.44            | 25.28         | 68.05         | 63.48         | 2.37          | 5.81          | 4.14           | 5.43           |

Table 7: Errors for FINE and COARSE configurations for 1 Variable for annotated proofs (No curriculum).

| Config       | Proof Type | Full Proof          |                          | Error Percentage |               |               |               |               |               |                |                |
|--------------|------------|---------------------|--------------------------|------------------|---------------|---------------|---------------|---------------|---------------|----------------|----------------|
|              |            | Full Proof Accuracy | Greedy Stepwise Accuracy | First FacStep    | Total FacStep | First MulStep | Total MulStep | First SumStep | Total SumStep | First MarkStep | Total MarkStep |
| SMALL COEFF  | Fine       | 82.3                | 97.93                    | 4.52             | 3.07          | 86.44         | 68.97         | 7.34          | 24.14         | 1.69           | 3.83           |
|              | Coarse     | <b>85</b>           | <b>98.31</b>             | 2                | 1.68          | 88.67         | 78.21         | 8             | 18.44         | 1.33           | 1.68           |
| MEDIUM COEFF | Fine       | 78.8                | 97.78                    | 8.96             | 6.79          | 80.19         | 68.21         | 9.43          | 22.5          | 1.42           | 2.5            |
|              | Coarse     | <b>80.1</b>         | <b>97.69</b>             | 9.05             | 7.79          | 87.94         | 80.33         | 3.02          | 10.66         | 0              | 1.23           |
| LARGE COEFF  | Fine       | 70.1                | 96.59                    | 13.38            | 10            | 69.9          | 59.32         | 13.38         | 25.45         | 3.34           | 5.23           |
|              | Coarse     | <b>73.2</b>         | <b>96.66</b>             | 10.45            | 7.84          | 79.85         | 70.87         | 7.84          | 18.49         | 1.87           | 2.8            |
| NO BACKTRACK | Fine       | 46.5                | 92.93                    | 9.16             | 5.15          | 74.21         | 57.9          | 14.58         | 33.69         | 2.06           | 3.25           |
|              | Coarse     | <b>65.5</b>         | <b>95.7</b>              | 3.19             | 2.61          | 90.14         | 77.31         | 5.22          | 18.27         | 1.45           | 1.81           |
| MEDIUM DEG   | Fine       | 59.6                | 95.28                    | 7.43             | 5.48          | 72.03         | 57.1          | 15.35         | 32.9          | 5.2            | 4.52           |
|              | Coarse     | <b>65.1</b>         | <b>95.61</b>             | 6.88             | 5.26          | 78.51         | 67.79         | 11.46         | 24.63         | 3.15           | 2.32           |
| MEDIUM TERMS | Fine       | <b>56.9</b>         | <b>95.7</b>              | 21.58            | 13.3          | 67.29         | 57.72         | 8.58          | 23.96         | 2.55           | 5.02           |
|              | Coarse     | 52.8                | 94.57                    | 23.94            | 15.6          | 68.22         | 62.77         | 3.6           | 16.67         | 4.24           | 4.96           |

Table 8: Errors for FINE and COARSE configurations for 2 Variable for annotated proofs (No curriculum).

a setting where polynomial simplification steps only involve symbolic addition and multiplication, without any arithmetic manipulation. For example, instead of multiplying 3 and 4 as 12, the model will output  $c_1 * c_2$  given coefficients  $c_1$  and  $c_2$ . The results for 1 Variable setting are presented in Table 9. Here, MEDIUM COEFF and MEDIUM DEGREE denote the same configuration as the case with integer coefficients. The only difference being that the limits of coefficients no longer apply. The errors made by the model for each kind of step are summarized in Table 10. We observe that the proof accuracy is about 20% less than

| Config        | Proof Type    | Endpoint |               | #Train | Full Proof      |                      |
|---------------|---------------|----------|---------------|--------|-----------------|----------------------|
|               |               | #EE      | Endpoint Acc. |        | Full Proof Acc. | Greedy Stepwise Acc. |
| MEDIUM COEFF  | Coarse/Infix  | 5M       | 93.5          | 4.3M   | 78.5            | 94.19                |
|               | Fine/Infix    |          |               | 2.8M   | 63.5            | 90.64                |
|               | Coarse/Prefix | 4.9M     | 89.77         | 3.7M   | 70.9            | 91.53                |
|               | Fine/Prefix   |          |               | 4.3M   | 70.9            | 93.2                 |
| MEDIUM DEGREE | Coarse/Infix  | 5.6M     | 88            | 3.7M   | 65.2            | 89.55                |
|               | Fine/Infix    |          |               | 6.3M   | 75.5            | 94.59                |
|               | Coarse/Prefix | 6.3M     | 83.93         | 3.4M   | 57.6            | 85.98                |
|               | Fine/Prefix   |          |               | 6.7M   | 67.7            | 92.76                |

Table 9: Results for Symbolic Coeff setting. (No curriculum, No annotation).

| Config        | Proof Type    | Endpoint |               | #Train | Full Proof      |                      |
|---------------|---------------|----------|---------------|--------|-----------------|----------------------|
|               |               | #EE      | Endpoint Acc. |        | Full Proof Acc. | Greedy Stepwise Acc. |
| MEDIUM COEFF  | Coarse/Infix  | 5M       | 93.5          | 4.3M   | 78.5            | 94.19                |
|               | Fine/Infix    |          |               | 2.8M   | 63.5            | 90.64                |
|               | Coarse/Prefix | 4.9M     | 89.77         | 3.7M   | 70.9            | 91.53                |
|               | Fine/Prefix   |          |               | 4.3M   | 70.9            | 93.2                 |
| MEDIUM DEGREE | Coarse/Infix  | 5.6M     | 88            | 3.7M   | 65.2            | 89.55                |
|               | Fine/Infix    |          |               | 6.3M   | 75.5            | 94.59                |
|               | Coarse/Prefix | 6.3M     | 83.93         | 3.4M   | 57.6            | 85.98                |
|               | Fine/Prefix   |          |               | 6.7M   | 67.7            | 92.76                |

Table 10: Errors made by models in Symbolic Coeff setting. (No curriculum, No annotation).

## H OUT-OF-DISTRIBUTION EVALUATION

We present the results for Out-of-Distribution evaluation here. Table 11 contains results for best 2 variable models (Prefix/Coarse) tested on 1 Variable setting.

Table 12 contains results for best 1 variable models (Prefix/Coarse) tested on SMALL, MEDIUM and



LARGE coefficient setting. As expected, the SMALL and MEDIUM models perform much worse when tested on higher coefficients.

| Config        | Train/Test= 2 Var/1 Var |                      | Train/Test= 1 Var/1 Var |                      | Train/Test= 2 Var/2 Var |                      |
|---------------|-------------------------|----------------------|-------------------------|----------------------|-------------------------|----------------------|
|               | Full Proof Acc.         | Greedy Stepwise Acc. | Full Proof Acc.         | Greedy Stepwise Acc. | Full Proof Acc.         | Greedy Stepwise Acc. |
| SMALL COEFF   | <b>95.34</b>            | <b>99.12</b>         | 95.3                    | 98.97                | 91.2                    | 98.08                |
| MEDIUM COEFF  | 87.4                    | 97.11                | <b>93.6</b>             | <b>98.58</b>         | 84.5                    | 96.03                |
| LARGE COEFF   | <b>89.4</b>             | <b>97.13</b>         | 83.5                    | 96.25                | 83.7                    | 96.23                |
| NO BACK TRACK | <b>84.2</b>             | <b>98.29</b>         | 79.7                    | 95.38                | 63.2                    | 89.87                |
| MEDIUM DEG    | <b>87.7</b>             | <b>97.83</b>         | 87.7                    | 96.82                | 83.4                    | 96.41                |
| MEDIUM TERMS  | <b>78.5</b>             | <b>96.16</b>         | 76.3                    | 95.78                | 67.8                    | 93.58                |

Table 11: Results for OOD Testing. NVAR = 2 COARSE/PREFIX models tested on corresponding NVAR = 1 setting (No curriculum, No annotation).

| Train Config | Test Config     |                      |                 |                      |                 |                      |
|--------------|-----------------|----------------------|-----------------|----------------------|-----------------|----------------------|
|              | SMALL COEFF     |                      | MEDIUM COEFF    |                      | LARGE COEFF     |                      |
|              | Full Proof Acc. | Greedy Stepwise Acc. | Full Proof Acc. | Greedy Stepwise Acc. | Full Proof Acc. | Greedy Stepwise Acc. |
| SMALL COEFF  | 95.3            | 98.97                | 33.4            | 69.05                | 31              | 68.02                |
| MEDIUM COEFF | <b>96.6</b>     | <b>99.29</b>         | 93.6            | 98.58                | 33.6            | 68.96                |
| LARGE COEFF  | 95.8            | 99.1                 | <b>94.4</b>     | <b>98.64</b>         | <b>83.5</b>     | <b>96.25</b>         |

Table 12: Prefix/Coarse 1 Variable Models tested on various coefficient limit configurations (SMALL, MEDIUM and COARSE). (No curriculum, No annotation).

## I CURRICULUM LEARNING

Learning the simplification steps should entail learning the sub-tasks, such as addition and multiplication (of numeric coefficients and symbolic variables); where multiplying variables precludes learning to add exponents of similar variables. As these sub-tasks are well-defined and dependencies among them are clear, we explore different types of curriculums based on the Mastering-Rate-based (MR) curriculum learning algorithm proposed in Willems et al. (2020). Authors in Willems et al. (2020) define curriculum learning by 1) a *curriculum* i.e. a set of tasks  $\mathcal{C} = \{c_1, \dots, c_n\}$ , where a task is set of examples of similar type with a sampling distribution, and 2) a *program* which for each training step defines the tasks to train the learner given its learning state and the curriculum. Formally, the program  $d : \mathbb{N} \rightarrow \mathcal{D}^{\mathcal{C}}$ , is a sequence of distributions over  $\mathcal{C}$ . The authors estimate the *program* function through an *attention* function which defines attention over the tasks at a time-step, and an *attention-to-distribution converter* which converts the attention to a distribution over  $\mathcal{C}$ . Authors observe that other algorithms (Matiisen et al., 2019; Graves et al., 2017) are special cases of the above setting with different choices for *program*.

To learn on tasks that are *learnable but not learnt yet*, authors define an *ordered curriculum*  $\mathcal{O}^{\mathcal{C}}$  which is a directed graph over tasks in  $\mathcal{C}$ . An edge from A to B indicates that learning task A before B is preferable. For supervised learners, the learnability for each task depends on mastering rate  $(\mathcal{M}_c(t))$  computed from the normalized mean accuracy for that task at time-step  $t$ . At each time-step, the MR algorithm computes attention over a task  $(a_c(t))$  from mastering rates of its ancestors and successors. During training to sample batches, a hyperparameter  $N_b$  for the curriculum determines the number of batches to be considered at a step, before re-computing the attention over tasks.

Using the *program*  $d$ , we first sample  $N_b * b$  examples from tasks in  $\mathcal{C}$ . The model is then trained on randomly sampled  $N_b$  minibatches are sampled updating the mastering rates.

For polynomial simplification for 1 variable, we define the following tasks ADD, MUL2, MUL3, SCOEFF and MIXED. For ADD, only one factor per product is allowed, so there is no multiplication. For MUL2 and MUL3 only 1 product is allowed with maximum two factors and three factors respectively. SCOEFF points to the SMALL COEFF configuration and MIXED is the final variable size configuration of the target variable configuration. We define the following curriculums:

- C: {(ADD, MUL3), (MUL3, MIXED), (ADD, MIXED)}.
- C2: {(ADD, MUL2), (MUL2, MUL3), (MUL3, MIXED), (ADD, MIXED)}.
- C4: {(ADD, MUL2), (MUL2, MUL3), (MUL3, SCOEFF), (ADD, SCOEFF) (SCOEFF, MIXED)}.

For all our experiments, we use the MR algorithm with gAmax Linreg A2D converter functions described in Willems et al. (2020). Model parameters and the training configurations remains the same as before<sup>1</sup>. We show the results in Table 13 for COARSE configuration. As coefficient size grows from SMALL, MEDIUM, LARGE to NO BACKTRACK - the improvements in full proof accuracy steadily increase from 1% to 10.84%. For NO BACKTRACK, the improvement in top-1 accuracy is by 20% from a no curriculum setting. However, we observe for MEDIUM TERMS, there is a drop in accuracy for all curriculums and input representations. It is possible that, more carefully designed curriculums may improve the results. There is no conceivable pattern observed for infix or prefix representations. However, compared to learning without curriculum, the improvement observed for infix representation is larger than prefix.

|               |        | Curriculum | #Train | Full Proof          |                   | Step-wise |            | Calibration |       |       |      |
|---------------|--------|------------|--------|---------------------|-------------------|-----------|------------|-------------|-------|-------|------|
|               |        |            |        | Full Proof Accuracy | Stepwise Accuracy | Top-1 Acc | Beam-5 Acc | Sure Rate   | P     | R     | F1   |
| Small Coeff   | Infix  | C          | 2.8M   | 94.38               | 98.76             | 94.84     | 96.68      | 89.36       | 100   | 94.22 | 0.97 |
|               |        | C2         | 2M     | <b>95.98</b>        | <b>99.0</b>       | 91.64     | 93.24      | 86.16       | 99.9  | 93.98 | 0.97 |
|               | Prefix | C          | 2.02M  | 94.26               | 98.65             | 77.76     | 80.46      | 70.62       | 99.94 | 90.77 | 0.95 |
|               |        | C2         | 2.29M  | 94.6                | 98.56             | 93.44     | 95.28      | 88.02       | 99.89 | 94.09 | 0.97 |
| Medium Coeff  | Infix  | C2         | 3.9M   | <b>95.44</b>        | <b>99.02</b>      | 94.86     | 96.44      | 91.18       | 100   | 96.12 | 0.98 |
|               |        | C4         | 2M     | 93.86               | 98.59             | 88.22     | 90.24      | 84.68       | 99.91 | 95.90 | 0.98 |
|               | Prefix | C2         | 3.7M   | 94.78               | 98.82             | 91.98     | 93.66      | 88.08       | 99.93 | 95.69 | 0.98 |
|               |        | C4         | 4.4M   | 94.8                | 98.87             | 85.3      | 87.82      | 80.62       | 99.98 | 94.49 | 0.97 |
| Large Coeff   | Infix  | C2         | 6.9M   | 91.26               | 97.92             | 96.4      | 98.06      | 90.24       | 99.89 | 93.51 | 0.97 |
|               |        | C4         | 7.6M   | 91.62               | 98.16             | 91.54     | 93.3       | 87.38       | 99.84 | 95.3  | 0.98 |
|               | Prefix | C2         | 6.5M   | 92.2                | 98.31             | 85.38     | 87.78      | 81.42       | 99.95 | 95.32 | 0.98 |
|               |        | C4         | 6.97M  | <b>92.46</b>        | <b>98.42</b>      | 91.3      | 93.34      | 87.54       | 100.0 | 95.88 | 0.98 |
| No Backtrack  | Infix  | C2         | 4.8M   | 86.44               | 97.27             | 93.68     | 95.46      | 88.72       | 99.98 | 94.68 | 0.97 |
|               |        | C4         | 5.1M   | 85.96               | 97.21             | 94.64     | 96.1       | 89.5        | 100   | 94.57 | 0.97 |
|               | Prefix | C2         | 7M     | 86.16               | 97.30             | 82.24     | 84.44      | 77.46       | 99.95 | 94.14 | 0.97 |
|               |        | C4         | 5.5M   | <b>86.48</b>        | <b>97.45</b>      | 92.6      | 94.3       | 87.78       | 99.95 | 94.75 | 0.97 |
| Medium Degree | Infix  | C2         | 3.5M   | 87.12               | 97.01             | 84.16     | 87.44      | 78.46       | 99.95 | 93.18 | 0.96 |
|               |        | C4         | 3.4M   | 94.12               | 98.65             | 90.62     | 81.984     | 86.66       | 99.93 | 95.56 | 0.98 |
|               | Prefix | C2         | 5.35M  | <b>94.28</b>        | <b>98.71</b>      | 80.8      | 82.84      | 75.76       | 100   | 93.51 | 0.97 |
|               |        | C4         | 3.5M   | 92.38               | 98.30             | 83.7      | 85.48      | 78.94       | 99.92 | 94.24 | 0.97 |
| Medium Terms  | Infix  | C2         | 4.4M   | 59.54               | 75.76             | 65.6      | 69.56      | 60.84       | 95.36 | 88.45 | 0.92 |
|               |        | C4         | 3.8M   | 56.94               | 76.72             | 69.84     | 73.44      | 60.76       | 97.5  | 84.82 | 0.91 |
|               | Prefix | C2         | 2.8M   | 41.84               | 51.24             | 40.62     | 45.36      | 36.9        | 92.57 | 84.10 | 0.88 |
|               |        | C4         | 3.37M  | 49.02               | 65.41             | 58.56     | 64.64      | 45.44       | 96.83 | 75.14 | 0.85 |

Table 13: Curriculum Learning results for 1 variable for the COARSE configuration for both Infix and prefix representations.

## REFERENCES

Alex Graves, Marc G Bellemare, Jacob Menick, Rémi Munos, and Koray Kavukcuoglu. Automated curriculum learning for neural networks. In *International Conference on Machine Learning*, pp. 1311–1320, 2017.

Tambet Matiisen, Avital Oliver, Taco Cohen, and John Schulman. Teacher-student curriculum learning. *IEEE transactions on neural networks and learning systems*, 2019.

<sup>1</sup>We use  $N_b$  as 10. For other default parameters in CL, please check [github.com/lcswillems/automatic-curriculum](https://github.com/lcswillems/automatic-curriculum).

Bartosz Piotrowski, Josef Urban, Chad E. Brown, and Cezary Kaliszyk. Can neural networks learn symbolic rewriting?, 2019.

Jesse Vig. A multiscale visualization of attention in the transformer model. In *Proceedings of the 57th Annual Meeting of the Association for Computational Linguistics: System Demonstrations*, pp. 37–42, 2019.

Lucas Willems, Salem Lahlou, and Yoshua Bengio. Mastering rate based curriculum learning, 2020.
